# Supplementary material
Source: PubMed Central journal article supplement (PMC2739130)
Supplement: NIHMS133294-supplement-1_si_001.pdf [file NIHMS133294-supplement-1_si_001.pdf]

## Supporting Information

### Elemental Analysis

#### High-Resolution Mass Spectra (HRMS) (EI)

### **Design, Synthesis, and X-ray Crystal Structure of Classical and Nonclassical 2-Amino-4-oxo-5-substituted-6-ethyl-thieno[2,3-*d*]pyrimidines as Dual Thymidylate Synthase and Dihydrofolate Reductase Inhibitors and as Potential Antitumor Agents**

Aleem Gangjee,<sup>\*,†</sup> Wei Li,<sup>†</sup> Roy L. Kisliuk,<sup>‡</sup> Vivian Cody,<sup>§</sup> Jim Pace,<sup>§</sup> Jennifer Piriano,<sup>§</sup> and Jennifer Makin<sup>§</sup>

## Elemental Analysis

| Compd | Formula                                                                                                                             | Calcd, % |      |       |       |       | Found, % |      |       |       |       |
|-------|-------------------------------------------------------------------------------------------------------------------------------------|----------|------|-------|-------|-------|----------|------|-------|-------|-------|
|       |                                                                                                                                     | C        | H    | N     | S     | I     | C        | H    | N     | S     | I     |
| 5     | C <sub>8</sub> H <sub>9</sub> N <sub>3</sub> OS•<br>0.09CH <sub>3</sub> COCH <sub>3</sub>                                           | 49.54    | 4.79 | 20.95 | 15.99 |       | 49.47    | 4.69 | 20.72 | 16.20 |       |
| 6     | C <sub>8</sub> H <sub>8</sub> IN <sub>3</sub> OS•<br>0.34CH <sub>2</sub> Cl <sub>2</sub>                                            | 28.61    | 2.49 | 12.00 | 9.15  | 36.24 | 28.61    | 2.45 | 11.62 | 8.83  | 36.45 |
| 8     | C <sub>15</sub> H <sub>13</sub> N <sub>3</sub> O <sub>3</sub> S <sub>2</sub> •<br>1.94CH <sub>3</sub> COCH <sub>3</sub>             | 54.32    | 5.36 | 9.12  | 13.90 |       | 54.62    | 5.28 | 9.18  | 13.99 |       |
| 9     | C <sub>24</sub> H <sub>28</sub> N <sub>4</sub> O <sub>6</sub> S <sub>2</sub> •<br>0.59CH <sub>3</sub> COCH <sub>3</sub>             | 54.60    | 5.60 | 9.88  | 11.30 |       | 54.66    | 5.46 | 9.94  | 11.23 |       |
| 2     | C <sub>20</sub> H <sub>20</sub> N <sub>4</sub> O <sub>6</sub> S <sub>2</sub> •<br>0.31CH <sub>3</sub> COCH <sub>3</sub> •<br>.79HCl | 48.01    | 4.36 | 10.68 | 12.23 |       | 47.97    | 4.75 | 10.67 | 12.37 |       |

## High-Resolution Mass Spectra (HRMS) (EI)

| Compound | Formula                                                                        | Calcd mass | Found mass |
|----------|--------------------------------------------------------------------------------|------------|------------|
| 7        | C <sub>16</sub> H <sub>15</sub> N <sub>3</sub> O <sub>3</sub> S <sub>2</sub>   | 361.0554   | 361.0556   |
| 9        | C <sub>24</sub> H <sub>28</sub> N <sub>4</sub> O <sub>6</sub> S <sub>2</sub>   | 532.1450   | 532.1444   |
| 2a       | C <sub>14</sub> H <sub>13</sub> N <sub>3</sub> OS <sub>2</sub>                 | 303.0500   | 303.0503   |
| 2b       | C <sub>14</sub> H <sub>12</sub> N <sub>3</sub> OCIS <sub>2</sub>               | 337.0110   | 337.0093   |
| 2c       | C <sub>14</sub> H <sub>13</sub> N <sub>4</sub> O <sub>3</sub> S <sub>2</sub>   | 349.0429   | 349.0403   |
| 2d       | C <sub>16</sub> H <sub>17</sub> N <sub>3</sub> O <sub>3</sub> S <sub>2</sub>   | 363.0711   | 363.0706   |
| 2e       | C <sub>14</sub> H <sub>11</sub> C <sub>12</sub> N <sub>3</sub> OS <sub>2</sub> | 370.9715   | 370.9720   |
| 2f       | C <sub>14</sub> H <sub>11</sub> Cl <sub>2</sub> N <sub>3</sub> OS <sub>2</sub> | 370.9708   | 370.9720   |
| 2g       | C <sub>18</sub> H <sub>15</sub> N <sub>3</sub> OS <sub>2</sub>                 | 353.0656   | 353.0653   |
| 2h       | C <sub>13</sub> H <sub>13</sub> N <sub>4</sub> OS <sub>2</sub>                 | 305.0531   | 305.0528   |
| 2i       | C <sub>14</sub> H <sub>12</sub> FN <sub>3</sub> OS <sub>2</sub>                | 321.0405   | 321.0404   |
| 2j       | C <sub>14</sub> H <sub>12</sub> BrN <sub>3</sub> OS <sub>2</sub>               | 380.9605   | 380.9611   |
| 2k       | C <sub>14</sub> H <sub>12</sub> ClN <sub>3</sub> OS <sub>2</sub>               | 337.0119   | 337.0110   |
| 2l       | C <sub>16</sub> H <sub>17</sub> N <sub>3</sub> O <sub>3</sub> S <sub>2</sub>   | 363.0711   | 363.0721   |
| 2m       | C <sub>14</sub> H <sub>12</sub> ClN <sub>3</sub> OS <sub>2</sub>               | 337.0110   | 337.0113   |
